# Supplementary material for: TGF-β/SMAD Pathway Is Modulated by miR-26b-5p: Another Piece in the Puzzle of Chronic Lymphocytic Leukemia Progression
Source: MDPI journal article supplement (doi:10.3390/cancers14071676), 2022-03-25
Supplement: s1 [file s1]

Table S1. miRNAs quantification

| miRNA Copy number |                   |              |             |             |
|-------------------|-------------------|--------------|-------------|-------------|
|                   | Progressive U-CLL | Stable U-CLL | Ratio       | p-value     |
| hsa-miR-320d      | 0                 | 3,368248698  | 0           | 5,34967E-07 |
| hsa-miR-199a-3p   | 49,91845618       | 165,114832   | 0,302325694 | 0,000385909 |
| hsa-miR-125a-5p   | 695,614177        | 2663,107868  | 0,261203906 | 0,002290477 |
| hsa-miR-584-5p    | 0                 | 42,32120514  | 0           | 0,002624039 |
| hsa-miR-19a-3p    | 126,3814747       | 39,38668568  | 3,20873596  | 0,004777564 |
| hsa-miR-7-5p      | 566,4835211       | 252,6014073  | 2,242598437 | 0,005746643 |
| hsa-miR-34a-5p    | 96,34024958       | 13,14085074  | 7,331355594 | 0,007615796 |
| hsa-miR-139-5p    | 0                 | 21,65443511  | 0           | 0,007935292 |
| hsa-miR-142-3p    | 2350,117054       | 980,2907213  | 2,397367438 | 0,009422079 |
| hsa-let-7g-5p     | 66201,66043       | 38117,29019  | 1,736788216 | 0,014332678 |
| hsa-miR-942       | 0,831998669       | 7,434188459  | 0,111915197 | 0,015519724 |
| hsa-miR-3912      | 3,671550825       | 0 -          |             | 0,017241755 |
| hsa-miR-769-5p    | 203,2663465       | 340,5723598  | 0,596837473 | 0,017686705 |
| hsa-miR-409-5p    | 0                 | 26,70803995  | 0           | 0,017960356 |
| hsa-miR-146a-5p   | 10771,99971       | 23256,82483  | 0,463175855 | 0,018171124 |
| hsa-miR-19b-3p    | 731,0875412       | 269,0524679  | 2,717267553 | 0,018830696 |
| hsa-miR-133a      | 0                 | 5,484870489  | 0           | 0,018945282 |
| hsa-miR-2110      | 11,90080054       | 23,31377906  | 0,510462097 | 0,020597268 |
| hsa-miR-425-5p    | 587,1195757       | 813,653997   | 0,72158384  | 0,020781443 |
| hsa-miR-4424      | 3,12895891        | 0 -          |             | 0,02240262  |
| hsa-miR-454-5p    | 0,693332224       | 11,66743204  | 0,059424578 | 0,023241231 |
| hsa-miR-106b-5p   | 263,2833054       | 115,3211083  | 2,283045223 | 0,026510391 |
| hsa-miR-493-3p    | 0                 | 2,887422254  | 0           | 0,026890407 |
| hsa-miR-320c      | 4,328661456       | 16,19311323  | 0,267314963 | 0,028785533 |
| hsa-miR-126-3p    | 90,50857503       | 711,0074054  | 0,127296248 | 0,028899352 |
| hsa-miR-330-3p    | 24,02441858       | 88,20151141  | 0,272381031 | 0,029106853 |
| hsa-miR-7-1-3p    | 100,9338041       | 30,23620171  | 3,338177362 | 0,029173977 |
| hsa-miR-1307-3p   | 56,60408122       | 107,3006683  | 0,52752776  | 0,034038907 |
| hsa-miR-3609      | 5,305180509       | 48,54593673  | 0,109281659 | 0,03722726  |
| hsa-miR-1468      | 51,85356649       | 31,27835476  | 1,65780991  | 0,037728093 |
| hsa-miR-598       | 64,44769925       | 20,13145562  | 3,201343235 | 0,038341607 |
| hsa-miR-29c-5p    | 28,70907604       | 4,928471056  | 5,825148553 | 0,044007965 |
| hsa-miR-181c-3p   | 0,693332224       | 4,546766205  | 0,152489086 | 0,045963492 |
| hsa-miR-374b-5p   | 769,2182516       | 465,9226412  | 1,650957012 | 0,0468327   |
| hsa-miR-199a-5p   | 70,78318222       | 1402,082397  | 0,050484324 | 0,047099112 |
| hsa-miR-15a-5p    | 413,8523788       | 196,9572661  | 2,101229303 | 0,052114711 |
| hsa-miR-374b-3p   | 15,81346266       | 4,810728032  | 3,287124642 | 0,053389961 |
| hsa-miR-1343      | 0                 | 5,414224675  | 0           | 0,055164497 |
| hsa-miR-1301      | 23,54804993       | 80,64711634  | 0,291988741 | 0,057379434 |
| hsa-miR-487b      | 0                 | 3,224493482  | 0           | 0,059052001 |
| hsa-miR-758       | 0                 | 6,448986965  | 0           | 0,059052001 |

|                  |             |             |             |             |
|------------------|-------------|-------------|-------------|-------------|
| hsa-miR-130a-3p  | 0           | 17,1572297  | 0           | 0,060298528 |
| hsa-miR-493-5p   | 1,591554153 | 7,988124305 | 0,199240033 | 0,068802203 |
| hsa-miR-409-3p   | 0           | 24,73763696 | 0           | 0,07061368  |
| hsa-miR-340-3p   | 81,64160643 | 141,1926292 | 0,57822853  | 0,070676455 |
| hsa-miR-191-3p   | 4,503549493 | 11,66743204 | 0,385993206 | 0,072408073 |
| hsa-let-7i-5p    | 31251,30105 | 17013,45332 | 1,836858188 | 0,072664144 |
| hsa-miR-142-5p   | 12410,71072 | 8237,4186   | 1,506626204 | 0,073123908 |
| hsa-miR-16-1-3p  | 2,990292465 | 0,601033056 | 4,975254584 | 0,074120139 |
| hsa-miR-3613-5p  | 164,1452132 | 45,81596395 | 3,582707839 | 0,075266761 |
| hsa-miR-370      | 0           | 32,77532207 | 0           | 0,077477036 |
| hsa-miR-335-5p   | 2834,928964 | 1047,713156 | 2,70582549  | 0,077803101 |
| hsa-miR-664-5p   | 79,82064886 | 217,0374955 | 0,367773544 | 0,078650263 |
| hsa-miR-323b-3p  | 0           | 3,104286871 | 0           | 0,080828725 |
| hsa-miR-146b-3p  | 26,67737483 | 75,65430296 | 0,352622042 | 0,082863918 |
| hsa-miR-340-5p   | 536,8410995 | 356,2315349 | 1,507000495 | 0,084622271 |
| hsa-miR-26a-2-3p | 11,19539445 | 1,562685945 | 7,164199876 | 0,08641557  |
| hsa-miR-505-5p   | 31,9046242  | 80,51075188 | 0,396277807 | 0,087886658 |
| hsa-miR-33b-3p   | 2,839552156 | 3,945733149 | 0,719651342 | 0,090524542 |
| hsa-miR-127-3p   | 2,839552156 | 114,811517  | 0,024732294 | 0,090539506 |
| hsa-miR-326      | 1,856813178 | 35,79171801 | 0,051878291 | 0,091053173 |
| hsa-miR-29b-3p   | 3807,226975 | 1572,491454 | 2,421143191 | 0,091699986 |
| hsa-miR-15b-5p   | 2061,703659 | 1389,00081  | 1,484307024 | 0,092282002 |
| hsa-miR-140-5p   | 134,2426545 | 52,60202214 | 2,552043611 | 0,092671912 |
| hsa-miR-361-3p   | 2657,107001 | 3331,634954 | 0,797538457 | 0,097266504 |
| hsa-miR-4326     | 0,831998669 | 4,089488365 | 0,203448108 | 0,097539584 |
| hsa-miR-130b-5p  | 74,69584434 | 213,1884203 | 0,350374773 | 0,100665314 |
| hsa-let-7e-5p    | 22,72849111 | 66,63004005 | 0,341114775 | 0,100777572 |
| hsa-miR-99b-5p   | 87,59731166 | 368,3477668 | 0,237811437 | 0,102405214 |
| hsa-miR-4524a-3p | 13,05842755 | 5,291554476 | 2,467786661 | 0,103502765 |
| hsa-miR-29b-1-5p | 9,037100654 | 2,887422254 | 3,129816099 | 0,104286001 |
| hsa-miR-744-5p   | 74,25533129 | 219,6771138 | 0,338020334 | 0,106928736 |
| hsa-miR-500a-5p  | 6,221696227 | 1,562685945 | 3,981411779 | 0,111589144 |
| hsa-miR-374a-3p  | 78,47130396 | 29,58807145 | 2,652126351 | 0,112640842 |
| hsa-miR-624-5p   | 4,479401765 | 3,608661921 | 1,24129161  | 0,121369765 |
| hsa-miR-1273c    | 0,970665114 | 5,508419094 | 0,176214826 | 0,122795477 |
| hsa-miR-641      | 9,983618039 | 4,306352983 | 2,318346424 | 0,126158637 |
| hsa-miR-101-3p   | 5632,338615 | 2018,696371 | 2,790087056 | 0,127910047 |
| hsa-miR-20a-5p   | 1096,177259 | 401,1438848 | 2,732628617 | 0,131630857 |
| hsa-miR-93-3p    | 7,270658464 | 14,00338203 | 0,519207321 | 0,132438482 |
| hsa-miR-889      | 0           | 10,54093892 | 0           | 0,133314504 |
| hsa-miR-590-3p   | 667,5150159 | 118,206067  | 5,647045308 | 0,138815259 |
| hsa-miR-454-3p   | 25,93574714 | 14,69860951 | 1,764503447 | 0,139319106 |
| hsa-miR-26b-5p   | 20272,80686 | 5950,562499 | 3,406872352 | 0,139956645 |

|                  |             |             |             |             |
|------------------|-------------|-------------|-------------|-------------|
| hsa-miR-296-3p   | 0           | 3,321151489 | 0           | 0,140704441 |
| hsa-miR-126-5p   | 31,69900252 | 378,721622  | 0,083700007 | 0,141191519 |
| hsa-miR-146b-5p  | 5075,277811 | 10398,52139 | 0,488076874 | 0,149281707 |
| hsa-miR-181d     | 6,553178512 | 15,7829326  | 0,415206646 | 0,151855485 |
| hsa-miR-654-3p   | 0           | 47,94106376 | 0           | 0,155473353 |
| hsa-miR-4485     | 8,729766097 | 586,0293325 | 0,014896466 | 0,156323146 |
| hsa-miR-20b-5p   | 41,6954264  | 15,92176064 | 2,61876983  | 0,159799718 |
| hsa-miR-450b-5p  | 1,109331558 | 8,706900385 | 0,127408321 | 0,161736367 |
| hsa-let-7i-3p    | 69,26480322 | 38,45981206 | 1,800965723 | 0,162482436 |
| hsa-miR-193a-5p  | 5,034067544 | 6,736497397 | 0,747282638 | 0,163934553 |
| hsa-miR-550a-3p  | 4,756734655 | 2,406595809 | 1,976540737 | 0,164264851 |
| hsa-miR-548j     | 1,386664448 | 4,546766205 | 0,304978173 | 0,165376019 |
| hsa-miR-651      | 15,97042289 | 3,365785111 | 4,74493242  | 0,165572089 |
| hsa-miR-21-5p    | 28241,26304 | 15055,12872 | 1,875856631 | 0,166562948 |
| hsa-miR-5010-3p  | 0           | 2,286389198 | 0           | 0,169496121 |
| hsa-miR-30e-5p   | 19530,16537 | 11312,69978 | 1,726392969 | 0,171495002 |
| hsa-miR-224-5p   | 0           | 43,99533061 | 0           | 0,17606662  |
| hsa-miR-3681-5p  | 5,208955582 | 10,44181732 | 0,498855268 | 0,179658703 |
| hsa-miR-652-3p   | 318,332786  | 547,6185032 | 0,581303926 | 0,180555547 |
| hsa-miR-106b-3p  | 276,0936697 | 360,7930827 | 0,765241029 | 0,184164254 |
| hsa-miR-28-3p    | 3932,176776 | 5077,74497  | 0,774394303 | 0,184587048 |
| hsa-miR-185-5p   | 657,3228465 | 860,7434711 | 0,763668699 | 0,186411103 |
| hsa-miR-29a-5p   | 7,270658464 | 1,682892556 | 4,320334319 | 0,187289063 |
| hsa-miR-4772-5p  | 3,345922478 | 8,419389953 | 0,39740676  | 0,188100654 |
| hsa-miR-1255a    | 1,802663782 | 5,341115273 | 0,337506998 | 0,188762325 |
| hsa-miR-4524b-3p | 24,60359808 | 8,053842945 | 3,054889231 | 0,192353733 |
| hsa-miR-155-3p   | 5,263104977 | 1,562685945 | 3,36798638  | 0,192709665 |
| hsa-miR-29a-3p   | 32814,57348 | 17744,44401 | 1,849287216 | 0,192921815 |
| hsa-miR-194-5p   | 40,04350292 | 19,96415179 | 2,005770309 | 0,194944816 |
| hsa-miR-421      | 16,2473898  | 39,47348934 | 0,411602574 | 0,195099719 |
| hsa-miR-16-5p    | 21533,2925  | 17436,84724 | 1,234930387 | 0,195473195 |
| hsa-miR-150-5p   | 118770,5198 | 84939,38025 | 1,398297462 | 0,205569897 |
| hsa-miR-379-5p   | 0           | 2,623460427 | 0           | 0,206223534 |
| hsa-miR-495      | 0           | 2,623460427 | 0           | 0,206223534 |
| hsa-miR-29c-3p   | 981,3640102 | 357,7501654 | 2,743154595 | 0,208623696 |
| hsa-miR-20a-3p   | 7,240656797 | 2,767215643 | 2,61658567  | 0,220119106 |
| hsa-miR-9-5p     | 38,97661288 | 12,05160048 | 3,234144125 | 0,221064528 |
| hsa-miR-98       | 608,8697178 | 838,5063353 | 0,726136097 | 0,226240922 |
| hsa-miR-625-3p   | 51,53379208 | 23,49724073 | 2,193184837 | 0,226350331 |
| hsa-miR-32-3p    | 2,978218601 | 1,0818595   | 2,752870036 | 0,227164465 |
| hsa-miR-629-3p   | 13,30539279 | 3,005165278 | 4,427507827 | 0,231303973 |
| hsa-miR-1226-3p  | 4,509403432 | 19,83025093 | 0,22740022  | 0,23143373  |
| hsa-miR-671-5p   | 9,290285815 | 2,644545445 | 3,512999118 | 0,233169338 |

|                  |             |             |             |             |
|------------------|-------------|-------------|-------------|-------------|
| hsa-miR-2964a-5p | 0           | 2,960531655 | 0           | 0,234295037 |
| hsa-miR-660-5p   | 110,6470411 | 55,50806583 | 1,993350687 | 0,237651056 |
| hsa-miR-22-3p    | 1894,797558 | 3035,335209 | 0,624246559 | 0,23777894  |
| hsa-miR-328      | 32,00633708 | 91,51882299 | 0,34972409  | 0,239492789 |
| hsa-miR-155-5p   | 36532,98913 | 65569,21578 | 0,557166785 | 0,241220613 |
| hsa-miR-191-5p   | 29793,88216 | 55012,39717 | 0,541584874 | 0,242748944 |
| hsa-miR-1277-3p  | 7,921915157 | 3,585113316 | 2,209669391 | 0,244202358 |
| hsa-let-7f-2-3p  | 16,16909267 | 8,732912576 | 1,851512028 | 0,244990114 |
| hsa-miR-423-5p   | 4220,889083 | 8820,002196 | 0,478558734 | 0,245454676 |
| hsa-miR-644b-5p  | 1,591554153 | 4,186146371 | 0,380195533 | 0,24589586  |
| hsa-miR-32-5p    | 122,3616117 | 56,04830741 | 2,183145529 | 0,250732981 |
| hsa-miR-374a-5p  | 2286,374401 | 1426,168201 | 1,603159009 | 0,250957107 |
| hsa-miR-125b-5p  | 102,9878231 | 213,8329998 | 0,48162736  | 0,251871542 |
| hsa-miR-3909     | 2,550145402 | 9,788759885 | 0,26051772  | 0,252390617 |
| hsa-miR-376c     | 0           | 3,297602884 | 0           | 0,256223112 |
| hsa-miR-361-5p   | 350,9204967 | 555,5811244 | 0,631627824 | 0,256968657 |
| hsa-miR-181b-5p  | 229,2408753 | 624,5050134 | 0,367076117 | 0,264782508 |
| hsa-miR-579      | 3,25555149  | 1,322272722 | 2,462087764 | 0,281744287 |
| hsa-miR-18a-3p   | 8,367916159 | 21,8762269  | 0,382511856 | 0,28326292  |
| hsa-miR-381      | 1,247998003 | 16,03073658 | 0,077850322 | 0,288940582 |
| hsa-miR-4677-3p  | 7,282732328 | 4,666972816 | 1,560483126 | 0,291851622 |
| hsa-miR-484      | 831,9496322 | 1242,338821 | 0,669664039 | 0,2923773   |
| hsa-miR-329      | 0           | 5,103165638 | 0           | 0,297989383 |
| hsa-miR-410      | 0           | 7,028935003 | 0           | 0,302459899 |
| hsa-miR-9-3p     | 15,37368158 | 3,705319927 | 4,149083449 | 0,302804624 |
| hsa-miR-138-5p   | 77,62503551 | 0 -         |             | 0,31049176  |
| hsa-miR-210      | 13,0280599  | 3,966818167 | 3,284259412 | 0,314960496 |
| hsa-miR-339-3p   | 456,6725027 | 288,6176697 | 1,582274928 | 0,315196118 |
| hsa-let-7g-3p    | 6,456953585 | 1,202066111 | 5,371546144 | 0,318466795 |
| hsa-miR-342-5p   | 341,6920441 | 593,7627023 | 0,575469026 | 0,322821919 |
| hsa-miR-138-1-3p | 7,198215279 | 0 -         |             | 0,323056829 |
| hsa-miR-122-5p   | 10,93598936 | 80,67834476 | 0,135550492 | 0,327887185 |
| hsa-miR-27b-5p   | 13,07013543 | 0,601033056 | 21,74611747 | 0,329675897 |
| hsa-miR-1        | 1,591554153 | 5,824405305 | 0,273256078 | 0,332923631 |
| hsa-let-7a-3p    | 109,5721012 | 46,24476601 | 2,369394651 | 0,3342639   |
| hsa-miR-181a-5p  | 2357,818705 | 6593,69683  | 0,357586763 | 0,334930592 |
| hsa-miR-212-5p   | 3,231403762 | 5,989245538 | 0,539534361 | 0,335378568 |
| hsa-miR-136-3p   | 1,326295127 | 23,78337484 | 0,05576564  | 0,339728325 |
| hsa-miR-101-5p   | 3,611181504 | 0,721239667 | 5,006909174 | 0,34198887  |
| hsa-miR-15b-3p   | 32,89285113 | 20,39788103 | 1,612562162 | 0,343441134 |
| hsa-miR-26a-5p   | 260847,9832 | 117001,9369 | 2,229433034 | 0,347293291 |
| hsa-miR-2355-5p  | 3,508736652 | 13,99599127 | 0,25069583  | 0,348457177 |
| hsa-miR-132-5p   | 4,202068876 | 7,408176267 | 0,567220423 | 0,355496518 |

|                   |             |             |             |             |
|-------------------|-------------|-------------|-------------|-------------|
| hsa-miR-1295a     | 94,33233011 | 76,06448359 | 1,240162631 | 0,355944025 |
| hsa-miR-338-5p    | 10,23094926 | 19,41021595 | 0,527090955 | 0,360218116 |
| hsa-miR-324-3p    | 22,72849111 | 10,33776856 | 2,198587731 | 0,361845775 |
| hsa-miR-27a-3p    | 3721,107425 | 2840,974882 | 1,309799481 | 0,367254195 |
| hsa-let-7b-5p     | 8397,615645 | 13768,75774 | 0,609903653 | 0,373982362 |
| hsa-miR-222-3p    | 1328,209391 | 1964,761726 | 0,676015505 | 0,377886446 |
| hsa-miR-150-3p    | 296,2818934 | 174,651948  | 1,696413334 | 0,379071715 |
| hsa-miR-625-5p    | 9,862879398 | 20,39788103 | 0,483524705 | 0,381183801 |
| hsa-miR-3611      | 2,158293796 | 0,961652889 | 2,244358459 | 0,383711655 |
| hsa-miR-181a-3p   | 17,76064683 | 68,67876867 | 0,258604619 | 0,385007363 |
| hsa-miR-181a-2-3p | 38,12558845 | 137,1431363 | 0,277998517 | 0,386948915 |
| hsa-miR-501-3p    | 125,4759349 | 191,4797863 | 0,655295983 | 0,390690103 |
| hsa-miR-450a-5p   | 14,83657762 | 31,29204902 | 0,474132506 | 0,390785598 |
| hsa-miR-17-5p     | 428,8598186 | 263,8611223 | 1,625324015 | 0,39435705  |
| hsa-miR-1973      | 2,218663117 | 28,2274686  | 0,078599436 | 0,396269579 |
| hsa-miR-335-3p    | 206,7194698 | 139,6608826 | 1,480152967 | 0,397424564 |
| hsa-miR-182-5p    | 74,95049345 | 143,8938371 | 0,520873548 | 0,398227154 |
| hsa-miR-320a      | 1234,392943 | 2128,352133 | 0,5799759   | 0,406134913 |
| hsa-miR-2277-5p   | 3,25555149  | 6,012794143 | 0,541437377 | 0,406379508 |
| hsa-miR-4662a-5p  | 8,639395109 | 4,06593976  | 2,124821227 | 0,407361916 |
| hsa-miR-22-5p     | 9,465173853 | 4,567851223 | 2,072128314 | 0,407579461 |
| hsa-miR-190b      | 3,243477626 | 1,562685945 | 2,075578677 | 0,411284625 |
| hsa-miR-141-3p    | 127,059807  | 25,03637807 | 5,075007521 | 0,411727695 |
| hsa-miR-451a      | 105,7263943 | 2107,597994 | 0,050164403 | 0,414436005 |
| hsa-miR-200a-3p   | 63,82827415 | 15,61316519 | 4,088105991 | 0,416124752 |
| hsa-miR-628-5p    | 4,238290468 | 1,803099167 | 2,350558719 | 0,417234546 |
| hsa-miR-486-5p    | 2535,329689 | 7474,204059 | 0,33921066  | 0,418866494 |
| hsa-miR-130b-3p   | 17,76064683 | 24,22587115 | 0,733127272 | 0,420253005 |
| hsa-miR-378c      | 10,610727   | 5,168884278 | 2,052808001 | 0,420282214 |
| hsa-miR-548k      | 22,7467849  | 30,88679556 | 0,736456615 | 0,421805694 |
| hsa-miR-509-3p    | 1,663997338 | 0 -         |             | 0,422649731 |
| hsa-miR-514a-3p   | 2,218663117 | 0 -         |             | 0,422649731 |
| hsa-miR-29b-2-5p  | 1,386664448 | 0 -         |             | 0,422649731 |
| hsa-miR-3614-5p   | 0           | 1,202066111 | 0           | 0,422649731 |
| hsa-miR-3687      | 0           | 2,644545445 | 0           | 0,422649731 |
| hsa-miR-4521      | 0,831998669 | 0 -         |             | 0,422649731 |
| hsa-miR-1273g-3p  | 0           | 5,409297501 | 0           | 0,422649731 |
| hsa-miR-708-3p    | 2,634662451 | 0 -         |             | 0,422649731 |
| hsa-miR-378d      | 1,109331558 | 0 -         |             | 0,422649731 |
| hsa-miR-362-3p    | 2,634662451 | 0 -         |             | 0,422649731 |
| hsa-miR-548h-3p   | 3,46666112  | 0 -         |             | 0,422649731 |
| hsa-miR-4524a-5p  | 1,663997338 | 0 -         |             | 0,422649731 |
| hsa-miR-222-5p    | 0,693332224 | 0 -         |             | 0,422649731 |

|                   |             |             |               |
|-------------------|-------------|-------------|---------------|
| hsa-miR-548g-5p   | 0,693332224 | 0 -         | 0,422649731   |
| hsa-miR-33a-5p    | 1,386664448 | 0 -         | 0,422649731   |
| hsa-miR-548a-3p   | 1,109331558 | 0 -         | 0,422649731   |
| hsa-miR-365a-3p   | 2,773328896 | 0 -         | 0,422649731   |
| hsa-miR-30a-3p    | 1,109331558 | 0 -         | 0,422649731   |
| hsa-miR-1285-5p   | 0,970665114 | 0 -         | 0,422649731   |
| hsa-miR-4645-3p   | 0,831998669 | 0 -         | 0,422649731   |
| hsa-miR-4662a-3p  | 0,831998669 | 0 -         | 0,422649731   |
| hsa-miR-944       | 0,831998669 | 0 -         | 0,422649731   |
| hsa-miR-141-5p    | 0,693332224 | 0 -         | 0,422649731   |
| hsa-miR-5000-3p   | 0,693332224 | 0 -         | 0,422649731   |
| hsa-miR-580       | 0,693332224 | 0 -         | 0,422649731   |
| hsa-miR-4772-3p   | 0           | 3,726404945 | 0 0,422649731 |
| hsa-miR-873-5p    | 0           | 5,048677667 | 0 0,422649731 |
| hsa-miR-424-3p    | 0           | 2,764752056 | 0 0,422649731 |
| hsa-miR-4433-3p   | 0           | 15,62685945 | 0 0,422649731 |
| hsa-miR-3690      | 0           | 2,524338834 | 0 0,422649731 |
| hsa-miR-556-5p    | 0           | 1,322272722 | 0 0,422649731 |
| hsa-miR-582-3p    | 0           | 0,961652889 | 0 0,422649731 |
| hsa-miR-371b-5p   | 0           | 1,202066111 | 0 0,422649731 |
| hsa-miR-4423-3p   | 9,814583941 | 0 -         | 0,422649731   |
| hsa-miR-34c-5p    | 0           | 0,721239667 | 0 0,422649731 |
| hsa-miR-1249      | 0           | 4,327438    | 0 0,422649731 |
| hsa-miR-432-5p    | 0           | 5,056068428 | 0 0,422649731 |
| hsa-miR-548a-3p   | 0           | 0,721239667 | 0 0,422649731 |
| hsa-miR-125a-3p   | 0           | 0,961652889 | 0 0,422649731 |
| hsa-miR-550a-3-5p | 0           | 0,601033056 | 0 0,422649731 |
| hsa-miR-548d-5p   | 0           | 1,562685945 | 0 0,422649731 |
| hsa-miR-656       | 0           | 3,033641057 | 0 0,422649731 |
| hsa-miR-3940-3p   | 0           | 2,022427371 | 0 0,422649731 |
| hsa-miR-3157-3p   | 0           | 0,601033056 | 0 0,422649731 |
| hsa-miR-1976      | 0           | 1,202066111 | 0 0,422649731 |
| hsa-miR-744-3p    | 0           | 1,202066111 | 0 0,422649731 |
| hsa-miR-382-5p    | 0           | 0,841446278 | 0 0,422649731 |
| hsa-miR-1284      | 0           | 1,923305778 | 0 0,422649731 |
| hsa-miR-548s      | 0           | 0,961652889 | 0 0,422649731 |
| hsa-miR-873-3p    | 0           | 2,043512389 | 0 0,422649731 |
| hsa-miR-139-3p    | 0           | 4,044854743 | 0 0,422649731 |
| hsa-miR-1303      | 1,326295127 | 0 -         | 0,422649731   |
| hsa-miR-1254      | 0           | 1,442479333 | 0 0,422649731 |
| hsa-miR-590-5p    | 0           | 0,601033056 | 0 0,422649731 |
| hsa-miR-543       | 0           | 0,601033056 | 0 0,422649731 |
| hsa-miR-4423-5p   | 1,856813178 | 0 -         | 0,422649731   |

|                  |             |             |             |             |
|------------------|-------------|-------------|-------------|-------------|
| hsa-miR-2355-3p  | 0           | 0,601033056 | 0           | 0,422649731 |
| hsa-miR-149-5p   | 0           | 0,721239667 | 0           | 0,422649731 |
| hsa-miR-4685-3p  | 0           | 1,322272722 | 0           | 0,422649731 |
| hsa-miR-485-3p   | 0           | 4,044854743 | 0           | 0,422649731 |
| hsa-miR-877-5p   | 0           | 2,524338834 | 0           | 0,422649731 |
| hsa-miR-1290     | 14,05872835 | 0 -         |             | 0,422649731 |
| hsa-miR-3917     | 1,326295127 | 0 -         |             | 0,422649731 |
| hsa-miR-570-3p   | 0           | 2,764752056 | 0           | 0,422649731 |
| hsa-miR-3130-3p  | 0           | 0,961652889 | 0           | 0,422649731 |
| hsa-miR-642a-3p  | 0           | 0,841446278 | 0           | 0,422649731 |
| hsa-miR-26-5p    | 0           | 147291,0839 | 0           | 0,422649731 |
| hsa-miR-4746-5p  | 0           | 1,562685945 | 0           | 0,422649731 |
| hsa-miR-3177-3p  | 0           | 0,841446278 | 0           | 0,422649731 |
| hsa-miR-4781-3p  | 0           | 0,841446278 | 0           | 0,422649731 |
| hsa-miR-940      | 0           | 0,841446278 | 0           | 0,422649731 |
| hsa-miR-3157-5p  | 0           | 0,841446278 | 0           | 0,422649731 |
| hsa-miR-548ab    | 0           | 0,841446278 | 0           | 0,422649731 |
| hsa-miR-4707-3p  | 0           | 0,841446278 | 0           | 0,422649731 |
| hsa-miR-615-3p   | 0           | 1,322272722 | 0           | 0,422649731 |
| hsa-miR-363-5p   | 0           | 0,721239667 | 0           | 0,422649731 |
| hsa-miR-491-5p   | 0           | 0,721239667 | 0           | 0,422649731 |
| hsa-miR-1180     | 0           | 0,721239667 | 0           | 0,422649731 |
| hsa-miR-433      | 0           | 1,322272722 | 0           | 0,422649731 |
| hsa-miR-3676-3p  | 0           | 0,601033056 | 0           | 0,422649731 |
| hsa-miR-4433-5p  | 0           | 0,601033056 | 0           | 0,422649731 |
| hsa-miR-548ap-5p | 0           | 0,601033056 | 0           | 0,422649731 |
| hsa-miR-5683     | 0           | 0,601033056 | 0           | 0,422649731 |
| hsa-miR-548ap-3p | 0           | 0,601033056 | 0           | 0,422649731 |
| hsa-miR-1277-5p  | 0           | 2,022427371 | 0           | 0,422649731 |
| hsa-miR-23a-5p   | 0           | 1,685356143 | 0           | 0,422649731 |
| hsa-miR-548at-5p | 0           | 1,685356143 | 0           | 0,422649731 |
| hsa-miR-144-3p   | 27,19033106 | 471,2343446 | 0,057700232 | 0,428278496 |
| hsa-miR-92a-3p   | 42989,00673 | 61492,03073 | 0,69909883  | 0,428590782 |
| hsa-miR-144-5p   | 3,050661786 | 44,34718336 | 0,068790429 | 0,429643857 |
| hsa-miR-629-5p   | 165,1074625 | 62,4625151  | 2,643304744 | 0,432129    |
| hsa-miR-378g     | 1,591554153 | 3,127835476 | 0,508835636 | 0,440676131 |
| hsa-miR-365b-3p  | 6,100957585 | 14,3826233  | 0,424189486 | 0,4444598   |
| hsa-miR-30a-5p   | 119,9033013 | 37,99376714 | 3,155867667 | 0,449275464 |
| hsa-miR-107      | 219,6648407 | 24,41672358 | 8,996491278 | 0,454680174 |
| hsa-miR-338-3p   | 45,76578072 | 8,874204205 | 5,157170115 | 0,455853758 |
| hsa-miR-941      | 191,1657782 | 276,5920814 | 0,691146967 | 0,459724365 |
| hsa-miR-103a-3p  | 2292,382416 | 2948,294901 | 0,777528196 | 0,459761401 |
| hsa-miR-30b-3p   | 4,292439864 | 7,677065268 | 0,559125097 | 0,4607242   |

|                  |             |             |             |             |
|------------------|-------------|-------------|-------------|-------------|
| hsa-miR-1291     | 43,6235848  | 18,56630608 | 2,349610343 | 0,460728377 |
| hsa-miR-30d-5p   | 12622,3     | 16619,43565 | 0,75949029  | 0,465992338 |
| hsa-miR-30c-5p   | 7821,618301 | 9604,620736 | 0,814359933 | 0,466758447 |
| hsa-miR-30e-3p   | 1312,005178 | 1039,169279 | 1,262551929 | 0,467469039 |
| hsa-miR-616-5p   | 9,700431211 | 6,736497397 | 1,439981438 | 0,4678242   |
| hsa-let-7d-5p    | 2996,209381 | 3931,702172 | 0,762064177 | 0,478309563 |
| hsa-miR-200c-3p  | 70,48353153 | 98,00258923 | 0,719200708 | 0,492360766 |
| hsa-miR-378a-5p  | 10,15850608 | 13,3738732  | 0,759578465 | 0,50225093  |
| hsa-miR-628-3p   | 17,98968426 | 28,45418756 | 0,632233277 | 0,505548637 |
| hsa-miR-486-3p   | 201,0407314 | 157,6012307 | 1,275629198 | 0,506617274 |
| hsa-miR-423-3p   | 4689,645325 | 6163,113609 | 0,760921447 | 0,511352938 |
| hsa-miR-548ar-5p | 3,231403762 | 1,682892556 | 1,920148586 | 0,513071561 |
| hsa-miR-362-5p   | 43,52735987 | 27,92626391 | 1,558653174 | 0,514507394 |
| hsa-miR-128      | 578,7062901 | 462,7627791 | 1,250546319 | 0,517976564 |
| hsa-miR-4454     | 1,663997338 | 4,091951952 | 0,406651241 | 0,51893055  |
| hsa-miR-192-5p   | 1453,510447 | 1005,788795 | 1,4451448   | 0,523247124 |
| hsa-miR-532-3p   | 14,10116987 | 7,092190056 | 1,988267341 | 0,530786371 |
| hsa-miR-3615     | 40,68195378 | 51,1792515  | 0,794891535 | 0,541083577 |
| hsa-miR-644b-3p  | 13,8842063  | 9,017959421 | 1,539617296 | 0,543661065 |
| hsa-miR-577      | 300,0760146 | 184,449475  | 1,62687378  | 0,546362885 |
| hsa-miR-3184-5p  | 40,90513727 | 23,32008256 | 1,754073433 | 0,54921768  |
| hsa-miR-548e     | 9,513469309 | 5,529504112 | 1,720492311 | 0,552122523 |
| hsa-miR-320b     | 4,973698224 | 6,47253557  | 0,768431192 | 0,556496207 |
| hsa-miR-3613-3p  | 15,56613144 | 21,2653395  | 0,731995435 | 0,556899669 |
| hsa-let-7a-5p    | 44119,09839 | 54790,20359 | 0,805236986 | 0,560609683 |
| hsa-miR-106a-5p  | 14,87901914 | 10,65375477 | 1,396598614 | 0,562346785 |
| hsa-miR-324-5p   | 45,15513562 | 27,14807268 | 1,663290656 | 0,569463717 |
| hsa-miR-200b-3p  | 56,23784128 | 28,43802972 | 1,977557582 | 0,570967864 |
| hsa-miR-16-2-3p  | 464,0613397 | 495,9940027 | 0,935618853 | 0,578382384 |
| hsa-miR-548w     | 2,990292465 | 1,803099167 | 1,658418195 | 0,583885046 |
| hsa-miR-618      | 1,856813178 | 5,769917334 | 0,321809321 | 0,584725742 |
| hsa-miR-24-2-5p  | 15,08390884 | 19,70018997 | 0,765673269 | 0,585584235 |
| hsa-miR-574-5p   | 17,00109134 | 20,64568501 | 0,823469472 | 0,585843383 |
| hsa-miR-18a-5p   | 20,49775413 | 27,21734218 | 0,753113732 | 0,585869178 |
| hsa-miR-1270     | 4,34073532  | 2,644545445 | 1,641391843 | 0,587190048 |
| hsa-miR-502-3p   | 150,4176011 | 205,5477997 | 0,731788914 | 0,587654083 |
| hsa-miR-21-3p    | 322,5443687 | 222,1647878 | 1,45182489  | 0,58921747  |
| hsa-miR-25-5p    | 57,74926838 | 75,70495102 | 0,762820233 | 0,591408484 |
| hsa-miR-5001-3p  | 1,802663782 | 0,601033056 | 2,999275606 | 0,591801012 |
| hsa-miR-511      | 2,495996006 | 0,841446278 | 2,966316534 | 0,594072875 |
| hsa-miR-589-5p   | 103,0203867 | 130,2242645 | 0,791099777 | 0,594735261 |
| hsa-miR-31-5p    | 15,45197871 | 26,09222537 | 0,592206241 | 0,595992288 |
| hsa-miR-100-5p   | 49,84528103 | 80,49488309 | 0,619235399 | 0,596721346 |



|                   |             |             |             |             |
|-------------------|-------------|-------------|-------------|-------------|
| hsa-miR-342-3p    | 5530,425338 | 6787,220225 | 0,814829217 | 0,602612271 |
| hsa-miR-92b-3p    | 129,8097183 | 178,0746847 | 0,728962225 | 0,604103642 |
| hsa-miR-25-3p     | 3039,79089  | 3650,256299 | 0,832760947 | 0,608693437 |
| hsa-miR-301a-5p   | 2,387331229 | 3,849075143 | 0,620235028 | 0,609235614 |
| hsa-miR-193b-3p   | 0,831998669 | 2,283925611 | 0,364284487 | 0,610914949 |
| hsa-miR-1271-5p   | 320,4120489 | 468,4275604 | 0,684016219 | 0,612221739 |
| hsa-miR-642a-5p   | 1,591554153 | 4,327438    | 0,367782081 | 0,61310535  |
| hsa-miR-331-3p    | 182,1169697 | 225,140101  | 0,808905072 | 0,627792623 |
| hsa-miR-378a-3p   | 1300,241213 | 1487,872234 | 0,873893055 | 0,629676071 |
| hsa-miR-215       | 8,651468973 | 4,808264445 | 1,799291423 | 0,633187172 |
| hsa-miR-296-5p    | 5,136512397 | 7,335066866 | 0,700267972 | 0,639743748 |
| hsa-miR-576-5p    | 33,5986232  | 22,72151309 | 1,478714163 | 0,640656522 |
| hsa-miR-199b-5p   | 82,54056033 | 116,496075  | 0,708526535 | 0,643114358 |
| hsa-miR-3074-5p   | 8,434139418 | 5,821941718 | 1,448681527 | 0,643951373 |
| hsa-miR-103a-2-5p | 6,197548498 | 4,930934643 | 1,256870948 | 0,644154317 |
| hsa-miR-10a-5p    | 338,3519756 | 407,8609626 | 0,829576759 | 0,650585802 |
| hsa-miR-185-3p    | 1,591554153 | 3,726404945 | 0,427101771 | 0,650895267 |
| hsa-miR-1285-3p   | 17,52575545 | 16,52772087 | 1,060385494 | 0,653000467 |
| hsa-miR-500a-3p   | 131,8425175 | 158,7403308 | 0,830554635 | 0,657155751 |
| hsa-miR-23b-5p    | 7,487622033 | 10,87801015 | 0,688326443 | 0,658851552 |
| hsa-miR-576-3p    | 6,31828714  | 3,971745341 | 1,590808724 | 0,660324953 |
| hsa-miR-204-5p    | 1,326295127 | 0,601033056 | 2,206692485 | 0,667807038 |
| hsa-miR-27b-3p    | 5005,175501 | 3763,090035 | 1,330070621 | 0,669010207 |
| hsa-miR-106a-3p   | 1,247998003 | 0,601033056 | 2,076421574 | 0,686398782 |
| hsa-miR-181c-5p   | 17,91175312 | 22,41784481 | 0,798995321 | 0,687228921 |
| hsa-miR-659-5p    | 2,990292465 | 2,043512389 | 1,463310172 | 0,692441137 |
| hsa-miR-497-5p    | 1,247998003 | 2,524338834 | 0,494386089 | 0,694796908 |
| hsa-miR-30c-1-3p  | 19,95516221 | 24,98051377 | 0,798829135 | 0,698515778 |
| hsa-miR-330-5p    | 11,7259125  | 9,114617428 | 1,286495302 | 0,70394933  |
| hsa-miR-766-3p    | 46,93950561 | 57,49571392 | 0,816400083 | 0,704229591 |
| hsa-miR-96-5p     | 38,42780104 | 48,95227745 | 0,785005378 | 0,705361222 |
| hsa-miR-582-5p    | 7,144065884 | 12,74190078 | 0,560675052 | 0,706221076 |
| hsa-miR-5196-3p   | 4,774662458 | 2,623460427 | 1,819986461 | 0,707969299 |
| hsa-miR-363-3p    | 743,5861828 | 997,3473019 | 0,745563939 | 0,708921361 |
| hsa-miR-664-3p    | 371,6955837 | 299,374386  | 1,241574433 | 0,715448176 |
| hsa-miR-223-3p    | 1084,201819 | 1475,512465 | 0,734796788 | 0,72081111  |
| hsa-miR-1296      | 0,970665114 | 1,803099167 | 0,538331519 | 0,723741903 |
| hsa-miR-145-3p    | 2,652590254 | 3,728868532 | 0,71136599  | 0,726513835 |
| hsa-miR-24-3p     | 2451,246597 | 2756,297624 | 0,889325803 | 0,733452289 |
| hsa-miR-671-3p    | 65,60496028 | 72,42596957 | 0,905820946 | 0,734574797 |
| hsa-miR-140-3p    | 1476,794698 | 1323,220185 | 1,116061193 | 0,735261937 |
| hsa-miR-574-3p    | 75,14769928 | 91,21653103 | 0,823838601 | 0,744121189 |
| hsa-miR-27a-5p    | 30,34270572 | 35,09402695 | 0,864611684 | 0,751036986 |

|                  |             |             |             |             |
|------------------|-------------|-------------|-------------|-------------|
| hsa-let-7d-3p    | 278,7971155 | 224,1496833 | 1,243798838 | 0,751635524 |
| hsa-let-7f-1-3p  | 10,16436002 | 7,455273477 | 1,36337856  | 0,752309006 |
| hsa-miR-148b-3p  | 797,5936494 | 740,9643547 | 1,076426476 | 0,762987564 |
| hsa-miR-23b-3p   | 194,7923256 | 146,1931224 | 1,332431529 | 0,76908612  |
| hsa-miR-874      | 91,89670342 | 111,3742879 | 0,825115968 | 0,771112094 |
| hsa-miR-186-5p   | 8374,719622 | 7878,474117 | 1,062987515 | 0,77417862  |
| hsa-let-7c       | 24,94678824 | 29,11463576 | 0,856846998 | 0,779327391 |
| hsa-miR-1299     | 1,326295127 | 0,841446278 | 1,576208918 | 0,78674845  |
| hsa-miR-148a-5p  | 63,56081921 | 55,86238216 | 1,137810755 | 0,79336578  |
| hsa-miR-1248     | 21,25694363 | 29,05029344 | 0,73172905  | 0,795146539 |
| hsa-miR-708-5p   | 22,6026305  | 16,0022608  | 1,412464825 | 0,801079367 |
| hsa-miR-339-5p   | 158,3804939 | 134,4996781 | 1,177552958 | 0,802434571 |
| hsa-miR-548o-3p  | 6,31828714  | 7,936099921 | 0,796145109 | 0,808240515 |
| hsa-miR-424-5p   | 5,781549164 | 4,447644612 | 1,299912576 | 0,812874954 |
| hsa-miR-99a-5p   | 139,026829  | 176,861966  | 0,786075334 | 0,813792252 |
| hsa-miR-425-3p   | 27,17789121 | 25,30526707 | 1,074001359 | 0,8141894   |
| hsa-miR-148a-3p  | 7888,058909 | 8665,346771 | 0,910299278 | 0,81722751  |
| hsa-let-7f-5p    | 54269,42503 | 56867,83744 | 0,954307874 | 0,818035767 |
| hsa-miR-1246     | 415,9173719 | 324,6353085 | 1,281183411 | 0,822816288 |
| hsa-miR-10b-5p   | 6,794655795 | 5,051141254 | 1,345172398 | 0,8265329   |
| hsa-miR-3173-5p  | 6,667697228 | 7,891466298 | 0,844925008 | 0,829720128 |
| hsa-miR-197-3p   | 273,9562298 | 233,8867079 | 1,171320219 | 0,831626921 |
| hsa-miR-499a-5p  | 48,00749361 | 46,43424211 | 1,033881279 | 0,835488209 |
| hsa-miR-3607-3p  | 1,856813178 | 1,322272722 | 1,404258854 | 0,836418374 |
| hsa-miR-223-5p   | 78,31470971 | 70,35289414 | 1,113169695 | 0,839031781 |
| hsa-miR-532-5p   | 146,8792288 | 133,9643637 | 1,096405229 | 0,851141327 |
| hsa-miR-30b-5p   | 5939,340621 | 5677,602838 | 1,046100051 | 0,858770743 |
| hsa-miR-26b-3p   | 68,99332427 | 70,65764968 | 0,97644522  | 0,859012063 |
| hsa-miR-143-3p   | 114,6650741 | 131,9131715 | 0,869246587 | 0,861119257 |
| hsa-miR-33a-3p   | 1,591554153 | 1,202066111 | 1,324015491 | 0,863212988 |
| hsa-miR-152      | 138,6499791 | 144,859619  | 0,957133396 | 0,866822028 |
| hsa-miR-132-3p   | 5,7694753   | 4,808264445 | 1,199908068 | 0,877873528 |
| hsa-miR-3605-3p  | 1,386664448 | 1,0818595   | 1,281741712 | 0,878363992 |
| hsa-miR-1179     | 1,386664448 | 1,0818595   | 1,281741712 | 0,878363992 |
| hsa-miR-766-5p   | 1,326295127 | 1,685356143 | 0,786952439 | 0,882435425 |
| hsa-miR-1307-5p  | 30,78321877 | 29,61901081 | 1,039306105 | 0,886953557 |
| hsa-miR-221-5p   | 524,6805261 | 561,7434681 | 0,934021588 | 0,887911092 |
| hsa-miR-196a-5p  | 6,100957585 | 7,214860254 | 0,845609945 | 0,891417785 |
| hsa-miR-17-3p    | 47,24208419 | 44,93973839 | 1,051231847 | 0,893564256 |
| hsa-miR-23a-3p   | 589,865829  | 628,5400138 | 0,938469813 | 0,894328632 |
| hsa-miR-331-5p   | 17,76101281 | 16,72350047 | 1,062039185 | 0,896120966 |
| hsa-miR-151a-5p  | 6515,320024 | 6075,931323 | 1,072316272 | 0,89977081  |
| hsa-miR-92a-1-5p | 38,68647415 | 41,32230939 | 0,93621278  | 0,91011797  |

|                 |             |             |             |             |
|-----------------|-------------|-------------|-------------|-------------|
| hsa-miR-550a-5p | 2,079996672 | 1,803099167 | 1,153567541 | 0,929051414 |
| hsa-miR-195-3p  | 0,693332224 | 0,601033056 | 1,153567541 | 0,929051414 |
| hsa-miR-200b-5p | 0,693332224 | 0,601033056 | 1,153567541 | 0,929051414 |
| hsa-miR-184     | 17,11012211 | 15,70735961 | 1,089306066 | 0,929594965 |
| hsa-miR-28-5p   | 788,7808302 | 757,9849998 | 1,040628549 | 0,933766106 |
| hsa-miR-505-3p  | 75,81761575 | 79,46504798 | 0,95410017  | 0,933834933 |
| hsa-miR-95      | 5,311400434 | 5,769917334 | 0,920533194 | 0,944829909 |
| hsa-miR-4775    | 0,970665114 | 1,0818595   | 0,897219199 | 0,945983851 |
| hsa-miR-183-5p  | 11,00843255 | 10,27944068 | 1,070917465 | 0,947994403 |
| hsa-miR-145-5p  | 4,774662458 | 5,051141254 | 0,945264093 | 0,961405711 |
| hsa-miR-93-5p   | 492,9943294 | 485,9226596 | 1,014553077 | 0,966131091 |
| hsa-miR-196b-5p | 3,713626356 | 3,849075143 | 0,964810044 | 0,974429079 |
| hsa-let-7b-3p   | 49,5979498  | 50,70965573 | 0,978077037 | 0,976044427 |
| hsa-miR-221-3p  | 1647,030252 | 1625,66785  | 1,013140693 | 0,976529493 |
| hsa-miR-151a-3p | 1201,647172 | 1180,131061 | 1,018231968 | 0,976769029 |
| hsa-miR-345-5p  | 84,09589289 | 84,78015106 | 0,991929029 | 0,987391377 |
| hsa-miR-301a-3p | 2,435626686 | 2,404132222 | 1,013100138 | 0,990774689 |
| hsa-miR-30d-3p  | 36,13669474 | 36,08661921 | 1,001387648 | 0,991200053 |
| hsa-miR-148b-5p | 43,16624191 | 43,13663923 | 1,000686254 | 0,992177799 |
| hsa-miR-195-5p  | 77,64515923 | 77,52558436 | 1,001542392 | 0,996549169 |
| hsa-miR-501-5p  | 1,326295127 | 1,322272722 | 1,003042039 | 0,998481294 |
