# Supplementary material for: TGF-β/SMAD Pathway Is Modulated by miR-26b-5p: Another Piece in the Puzzle of Chronic Lymphocytic Leukemia Progression
Source: MDPI journal article supplement (doi:10.3390/cancers14071676), 2022-03-25
Supplement: s1 [file s1]

**Supplementary Table S2: Primer sequences**

| Primer Name    | Primer sequences (5' to 3')                         |                                 |
|----------------|-----------------------------------------------------|---------------------------------|
| P21            | <b>Fw</b> CATGTGGACCTGTCACTGTCTTGT                  | <b>Rev</b> GAAGATCAGCCGGCGTTTG  |
| KLF10          | <b>Fw</b> CTCACATTGCCGCACCTTTC                      | <b>Rev</b> TGCTTTCATTGGGCAGGTCT |
| SMAD 2         | <b>Fw</b> GCTGGCCTGATCTTCACAGT                      | <b>Rev</b> CCAGAGGCGGAAGTTCTGTT |
| SMAD 3         | <b>Fw</b> AACGGGCAGGAGGAGAAATG                      | <b>Rev</b> CTGGGGATGGTGATGCACTT |
| SMAD 4         | <b>Fw</b> CCCATCCCGGACATTACTGG                      | <b>Rev</b> TAGGGCAGCTTGAAGGAACC |
| SMAD 7         | <b>Fw</b> GGACCAAACGATCTGCGCTC                      | <b>Rev</b> GGGATGGTGGTGACCTTTGG |
| U6             | <b>Fw</b> CTCGCT TCGGCAGCACA                        | <b>Rev</b> AACGTCTCACGAATTTGCGT |
| qGAPDH         | <b>Fw</b> TCGGAGTCAACGGATTTG                        | <b>Rev</b> CCTGGAAGATGGTGATGG   |
| GAPDH          | <b>Fw</b> GGTGCTGAGTATGTCGTGGA                      | <b>Rev</b> ATGCCAGTGAGCTTCCCGTT |
| C-myc          | <b>Fw</b> CTTTGTGTGCCCCGCTCCAG                      | <b>Rev</b> GCGCTCAGATCCTGCAGGTA |
| SL miR-26b-5p  | GTCGTATCCAGTGCAGGGTCCGAGGTATTCGCACTGGATACGACAACCTA  |                                 |
| SL miR-106b-5p | GTCGTATCCAGTGCAGGGTCCGAGGTATTCGCACTGGATACGACATCTGC  |                                 |
| SL miR-142-5p  | GTCGTATCCAGTGCAGGGTCCGAGGTATTCGCACTGGATACGACAGTAGT  |                                 |
| SL miR-7-5p    | GTCGTATCCAGTGCAGGGTCCGAGGTATTCGCACTGGATACGACAACAAC  |                                 |
| SL miR-let-7-g | GTCGTATCCAGTGCAGGGTCCGAGGTATTCGCACTGGATACGACAACCTGT |                                 |
| SL miR-19a-3p  | GTCGTATCCAGTGCAGGGTCCGAGGTATTCGCACTGGATACGACAGTTTT  |                                 |
| SL miR-374b-5p | GTCGTATCCAGTGCAGGGTCCGAGGTATTCGCACTGGATACGACACTTAG  |                                 |
| SL miR-146a-5p | GTCGTATCCAGTGCAGGGTCCGAGGTATTCGCACTGGATACGACAACCCA  |                                 |
| Uni Rev        | GTGCAGGGTCCGAGGT                                    |                                 |
| miR-106b-5p    | <b>Fw</b> GACCGCATAAAGTGCTGACAGTG                   |                                 |
| miR-142-5p     | <b>Fw</b> AGGCTCGCATAAAGTAGAAAGCACT                 |                                 |
| miR-7-5p       | <b>Fw</b> ACGGCGTGGAAGACTAGTGATTTT                  |                                 |
| miR-let-7-g    | <b>Fw</b> CGTGCCTGAGGTAGTAGTTTGTAC                  |                                 |
| miR-19a-3p     | <b>Fw</b> CAGCCATGTGCAAATCTATGCAAA                  |                                 |
| miR-374b-5p    | <b>Fw</b> GCGGCATATAATAACAACCTGCTAA                 |                                 |
| miR-146a-5p    | <b>Fw</b> GCCGAGTGAGAACTGAATTCCATG                  |                                 |
| miR-26b-5p     | <b>Fw</b> GGCGCGTTCAAGTAATTCAGGATAG                 |                                 |
